# Supplementary material for: Perspectives of people with aphasia post-stroke towards personal recovery and living successfully: A systematic review and thematic synthesis
Source: PubMed Central journal article supplement (PMC6430359; doi:10.1371/journal.pone.0214200), 2019-03-22
Supplement: pone.0214200.s010.pdf [file pone.0214200.s010.pdf]

## S8 Summary of included studies

|   | Reference                                                                                                                                                         | Country   | Population                                                                                                                      | No. participants with aphasia post-stroke | Sex: m/f | Mean age (years)   | Mean time since stroke (years) | Data collection                                                | Methodology / Analysis                       | Research objective(s)                                                                                                                                                                                            |
|---|-------------------------------------------------------------------------------------------------------------------------------------------------------------------|-----------|---------------------------------------------------------------------------------------------------------------------------------|-------------------------------------------|----------|--------------------|--------------------------------|----------------------------------------------------------------|----------------------------------------------|------------------------------------------------------------------------------------------------------------------------------------------------------------------------------------------------------------------|
| 1 | Armstrong E, Hersh D, Hayward C, Fraser J, Brown M. Living with aphasia: three Indigenous Australian stories. <i>Int J Speech Lang Pathol.</i> 2012;14(3):271-80. | Australia | Aboriginal Australian adults with acquired communication disorders post-stroke and their family members or community workers    | 3                                         | 3m       | 54.3, range: 47-63 | 15.5, range: 0.5-29 years      | Semi-structured interviews                                     | Thematic                                     | To present the stories of living with aphasia for three Indigenous Australian men living in Perth, Western Australia.                                                                                            |
| 2 | Armstrong E, Hersh D, Hayward C, Fraser J. Communication disorders after stroke in Aboriginal Australians. <i>Disabil Rehabil.</i> 2015;37(16-17):1462-9.         | Australia | 13 Aboriginal Australian adults with acquired communication disorders post-stroke and their family members or community workers | 7                                         | 4m, 3w   | 49.6, range: 30-63 | 9.6, range: 0.5-29             | Semi-structured interviews (linked with Armstrong et al 2012). | Thematic                                     | To explore Aboriginal Australians' experiences of acquired communication disorders in terms of functional and personal consequences as well as their experiences of SLT and other services received after stroke |
| 3 | Berg K, Askim T, Balandin S, Armstrong E, Rise MB. Experiences of participation in goal setting for people with stroke-induced aphasia in                         | Norway    | Adults with aphasia post-stroke                                                                                                 | 15                                        | 7m, 8w   | 61, range: 43-74   | Range 4 months - 9.7 years     | Interviews                                                     | Phenomenology - Systematic Text Condensation | To explore how PWA experienced client participation during the process of goal setting and clinical decision making in language rehabilitation                                                                   |

## S8 Summary of included studies

|   |                                                                                                                                                             |             |                                 |    |          |                  |                        |                                                                  |                                                                                                                                                                           |                                                                                                                                                   |
|---|-------------------------------------------------------------------------------------------------------------------------------------------------------------|-------------|---------------------------------|----|----------|------------------|------------------------|------------------------------------------------------------------|---------------------------------------------------------------------------------------------------------------------------------------------------------------------------|---------------------------------------------------------------------------------------------------------------------------------------------------|
|   | Norway. A qualitative study. Disabil Rehabil. 2016;1-9.                                                                                                     |             |                                 |    |          |                  |                        |                                                                  |                                                                                                                                                                           |                                                                                                                                                   |
| 4 | Bright FAS, Kayes NM, McCann CM, McPherson KM. Hope in people with aphasia. Aphasiology. 2013;27(1):41-58.                                                  | New Zealand | Adults with aphasia post-stroke | 5  | 3m, 2w   | 50, range: 41-62 | 2.8, range: 2-5 months | Semi-structured interviews                                       | Interpretive Description incorporating multiple analytic strategies including coding, constant comparison, narrative construction, thematic analysis, diagramming, memos. | To examine how PWA experience hope in the post-acute period of rehabilitation and what factors appear to influence a person's experience of hope. |
| 5 | Brown K, Worrall L, Davidson B, Howe T. Snapshots of success: An insider perspective on living successfully with aphasia. Aphasiology. 2010;24(10):1267-95. | Australia   | Adults with aphasia post-stroke | 25 | 13m, 12w | 63.2 ± 12.2      | 6 ± 5.2                | Semi-structured interviews and participant-generated photography | Interpretative Phenomenological Analysis                                                                                                                                  | To explore, from the perspectives of PWA, the meaning of living successfully with aphasia                                                         |
| 6 | Brown K, Davidson B, Worrall L, Howe T. "Making a good time": the role of friendship in living successfully with aphasia. Int J Speech Lang                 | Australia   | Adults with aphasia post-stroke | 25 | 13m, 12w | 63.2 ± 12.2      | 6 ± 5.2                | Analysis of data collected in Brown et al (2010)                 | Thematic                                                                                                                                                                  | To explore the perspectives of PWA on the role of friendship in living successfully with aphasia.                                                 |

## S8 Summary of included studies

|    |                                                                                                                                                                                   |                 |                                                      |    |          |                    |                              |                                                       |                                |                                                                                                                                                                |
|----|-----------------------------------------------------------------------------------------------------------------------------------------------------------------------------------|-----------------|------------------------------------------------------|----|----------|--------------------|------------------------------|-------------------------------------------------------|--------------------------------|----------------------------------------------------------------------------------------------------------------------------------------------------------------|
|    | Pathol.<br>2013;15(2):165-75.                                                                                                                                                     |                 |                                                      |    |          |                    |                              |                                                       |                                |                                                                                                                                                                |
| 7  | Cruice M, Worrall L, Hickson L. Perspectives of quality of life by people with aphasia and their family: suggestions for successful living. Top Stroke Rehabil. 2006;13(1):14-24. | Australia       | Adults with aphasia post-stroke                      | 4  | 4w       | 77, range: 68-81d  | range: 13 months - 3.5 years | Structured interviews                                 | Case study                     | To describe the perspectives of 4 older individuals with stroke and aphasia on what gives them quality in their lives                                          |
| 8  | Cruice M, Hill R, Worrall L, Hickson L. Conceptualising quality of life for older people with aphasia. Aphasiology. 2010;24(3):327-47.                                            | Australia       | Adults with aphasia post-stroke                      | 30 | 14m, 16w | 70.7, range: 57-88 | 3.4 ± 2.1                    | Structured interviews (linked with Cruice et al 2006) | Content analysis               | To conceptualise how older people with chronic aphasia who are living in the community describe their quality of life in terms of contributors and detractors. |
| 9  | Dalemans RJ, de Witte L, Wade D, van den Heuvel W. Social participation through the eyes of people with aphasia. Int J Lang Commun Disord. 2010;45(5):537-50.                     | The Netherlands | Adults with aphasia post-stroke and their caregivers | 13 | 7m, 6w   | 57.4, range: 45-71 | 5.1, range: 1.4-11           | Semi-structured interviews, diary, focus groups       | Open coding and categorisation | To explore how PWA perceive participation in society and to investigate influencing factors                                                                    |
| 10 | Dietz A, Thiessen                                                                                                                                                                 | United          | Adults with                                          | 3  | 2m, 1w   | 56.3, range:       | 7.3, range:                  | Semi-                                                 | Phenomenology,                 | To explore the social role                                                                                                                                     |

## S8 Summary of included studies

|    |                                                                                                                                                                                          |               |                                                   |    |        |               |                                 |                            |                                       |                                                                                                                                                                                                                                        |
|----|------------------------------------------------------------------------------------------------------------------------------------------------------------------------------------------|---------------|---------------------------------------------------|----|--------|---------------|---------------------------------|----------------------------|---------------------------------------|----------------------------------------------------------------------------------------------------------------------------------------------------------------------------------------------------------------------------------------|
|    | A, Griffith J, Peterson A, Sawyer E, McKelvey M. The renegotiation of social roles in chronic aphasia: Finding a voice through AAC. <i>Aphasiology</i> . 2013;27(3):309-25.              | States        | aphasia post-stroke and their relatives / friends |    |        | 41-85         | 2-15                            | structured interviews      | inductive approach                    | changes experienced by PWA, to understand the use of communication strategies when attempting to reclaim previous social roles and to determine whether discrepancies existed between the accounts of PWA and their potential proxies. |
| 11 | Doughty Horn EA. Identifying and addressing grief and loss issues in a person with aphasia: A single-case study. <i>Journal of Counseling &amp; Development</i> . 2016;94(2):225-34.     | United States | Adults with aphasia post-stroke                   | 1  | 1w     | Not available | Not available                   | Semi-structured interviews | Phenomenological reduction and coding | To provide a rich description of one individual's experiences with aphasia to help counsellors better conceptualise grief and loss issues in aphasia and to inform future counselling relationships                                    |
| 12 | Grohn B, Worrall LE, Simmons-Mackie N, Brown K. The first 3-months post-stroke: what facilitates successfully living with aphasia? <i>Int J Speech Lang Pathol</i> . 2012;14(4):390-400. | Australia     | Adults with aphasia                               | 15 | 8m, 7w | 66.3 ± 13.6   | All within 3 months +/- 2 weeks | Semi-structured interviews | Thematic                              | To explore the perspectives of PWA on factors that facilitate successful living during the first 3 months post-onset.                                                                                                                  |
| 13 | Grohn B, Worrall                                                                                                                                                                         | Australia     | Adults with                                       | 15 | 8m, 7w | 66.3 ± 13.6   | Interviews                      | Semi-                      | Phenomenology -                       | To describe the insider's                                                                                                                                                                                                              |

## S8 Summary of included studies

|    |                                                                                                                                                                                            |           |                                                                                      |    |         |                    |                                                |                                                          |                 |                                                                                                                                    |
|----|--------------------------------------------------------------------------------------------------------------------------------------------------------------------------------------------|-----------|--------------------------------------------------------------------------------------|----|---------|--------------------|------------------------------------------------|----------------------------------------------------------|-----------------|------------------------------------------------------------------------------------------------------------------------------------|
|    | L, Simmons-Mackie N, Hudson K. Living successfully with aphasia during the first year post-stroke: A longitudinal qualitative study. <i>Aphasiology</i> . 2014;28(12):1405-25.             |           | aphasia post-stroke                                                                  |    |         |                    | conducted at 3, 6, 9 and 12 months post-stroke | structured interviews (continuation of Grohn et al 2012) | Thematic        | perspective of what is important to living successfully with aphasia and changes that occur throughout the first year post-stroke. |
| 14 | Hemsley B, Werninck M, Worrall L. "That really shouldn't have happened": People with aphasia and their spouses narrate adverse events in hospital. <i>Aphasiology</i> . 2013;27(6):706-22. | Australia | Adults with aphasia (including 1 with Primary Progressive Aphasia) and their spouses | 10 | 8m, 2w  | 68.4, range: 64-71 | 5.4, range: 1-11                               | Interviews                                               | Narrative       | To describe and understand the adverse events experienced by PWA and their spouses in hospital                                     |
| 15 | Hersh D. How do people with aphasia view their discharge from therapy? <i>Aphasiology</i> . 2009;23(3):331-50.                                                                             | Australia | Adults with aphasia and their family members                                         | 21 | 13m, 8w | Range: 44-85       | Not available                                  | Interviews                                               | Grounded theory | To explore how PWA view their discharge from therapy.                                                                              |
| 16 | Hersh D. Hopeless, sorry, hopeless: Co-                                                                                                                                                    | Australia | Adults with aphasia post-stroke                                                      | 2  | 2w      | 34-61              | 4-8 years                                      | Secondary analysis of Worrall et al                      | Narrative       | To consider the knowledge, skills and attitudes underpinning co-                                                                   |

S8 Summary of included studies

|    |                                                                                                                                                                                                                                                                        |           |                                 |    |          |             |                                                 |                                                                                    |                                                                         |                                                                                                                                                                                                 |
|----|------------------------------------------------------------------------------------------------------------------------------------------------------------------------------------------------------------------------------------------------------------------------|-----------|---------------------------------|----|----------|-------------|-------------------------------------------------|------------------------------------------------------------------------------------|-------------------------------------------------------------------------|-------------------------------------------------------------------------------------------------------------------------------------------------------------------------------------------------|
|    | constructing narratives of care with people who have aphasia post-stroke. Topics in Language Disorders. 2015;35(3):219-37.                                                                                                                                             |           |                                 |    |          |             |                                                 | (2011) data collected (by first author) collected using semi-structured interviews |                                                                         | construction in the context of health care and to use examples from interviews with 2 PWA to illustrate narrative competence, the richness of their stories, and what lessons might be learned. |
| 17 | Hjelmblick F, Bernsten CB, Uvhagen H, Kunkel S, Holmström I. Understanding the meaning of rehabilitation to an aphasic patient through phenomenological analysis – a case study. International Journal of Qualitative Studies on Health and Well-being. 2007;2:93-100. | Sweden    | Adults with aphasia post-stroke | 1  | 1m       | 58 years    | 1st interview 3 months; 2nd interview 12 months | Interviews                                                                         | Phenomenology - Empirical Phenomenological & Psychological method (EPP) | To reveal the meaning of rehabilitation to a PWA, such as it was lived by him.                                                                                                                  |
| 18 | Howe TJ, Worrall LE, Hickson LMH. Interviews with people with aphasia: Environmental factors that influence their community                                                                                                                                            | Australia | Adults with aphasia post-stroke | 25 | 15m, 10w | 62.2 ± 10.7 | 5.6 ± 2.9                                       | Semi-structured interviews                                                         | Content analysis                                                        | To explore the environmental factors that hinder or support the community participation of PWA.                                                                                                 |

## S8 Summary of included studies

|    |                                                                                                                                                                                                     |                |                                                               |    |         |                    |                                        |                            |                                            |                                                                                                                                                        |
|----|-----------------------------------------------------------------------------------------------------------------------------------------------------------------------------------------------------|----------------|---------------------------------------------------------------|----|---------|--------------------|----------------------------------------|----------------------------|--------------------------------------------|--------------------------------------------------------------------------------------------------------------------------------------------------------|
|    | participation. Aphasiology. 2008;22(10):1092-120.                                                                                                                                                   |                |                                                               |    |         |                    |                                        |                            |                                            |                                                                                                                                                        |
| 19 | Jones F, Mandy A, Partridge C. Reasons for recovery after stroke: A perspective based on personal experience. Disabil Rehabil. 2008;30(7):507-16.                                                   | United Kingdom | 10 people with stroke                                         | 3  | 2m, 1w  | 59.7, range: 56-64 | 7.5 months, range: 6 weeks - 13 months | Interviews                 | Content analysis                           | To learn about individual beliefs and personal strategies used to support the period of recovery after stroke                                          |
| 20 | Le Dorze G, Brassard C. A description of the consequences of aphasia on aphasic persons and their relatives and friends, based on the WHO model of chronic diseases. Aphasiology. 1995;9(3):239-55. | Canada         | Adults with aphasia post-stroke and their relatives / friends | 9  | 5m, 4w  | 54.2, range: 41-69 | 6.6, range: 2-14                       | Semi-structured interviews | Constant comparison and deductive analysis | To describe the experience and consequences of aphasia from the perspectives of PWA and their friends and relatives and code according to the WHO ICDH |
| 21 | Le Dorze G, Salois-Bellerose É, Alepins M, Croteau C, Hallé M-C. A description of the personal and environmental determinants of participation                                                      | Canada         | Adults with aphasia post-stroke                               | 17 | 12m, 5w | 65.7 ± 7.5         | 5.7, range: 2-18                       | Focus groups               | Content analysis                           | To explore the factors that facilitate or hinder participation according to people who live with aphasia.                                              |

## S8 Summary of included studies

|    |                                                                                                                                                                                   |                |                                                                                                                                                                                   |    |        |                                 |                                      |                                                                     |                                         |                                                                                                                                                                                            |
|----|-----------------------------------------------------------------------------------------------------------------------------------------------------------------------------------|----------------|-----------------------------------------------------------------------------------------------------------------------------------------------------------------------------------|----|--------|---------------------------------|--------------------------------------|---------------------------------------------------------------------|-----------------------------------------|--------------------------------------------------------------------------------------------------------------------------------------------------------------------------------------------|
|    | several years post-stroke according to the views of people who have aphasia. <i>Aphasiology</i> . 2014;28(4):421-39.                                                              |                |                                                                                                                                                                                   |    |        |                                 |                                      |                                                                     |                                         |                                                                                                                                                                                            |
| 22 | MacKenzie C, Bennett A, Cairney M. Active citizenship and acquired neurological communication difficulty. <i>Disabil Rehabil</i> . 2011;33(3):187-94.                             | United Kingdom | 6 adults with communication support needs (CSN) from acquired neurological lesions including post-stroke aphasia and dysarthria, Parkinson's Disease and dysarthria and Dementia. | 3  | 1m, 2w | range: 54-78 (all participants) | range: 3-22 years (all participants) | Interviews                                                          | Content analysis                        | To explore the experience of civically engaged adults with CSN in terms of motivations, barriers and changes which might facilitate more effective civic participation of people with CSN. |
| 23 | Mc Menamin R, Tierney E, Mac Farlane A. Addressing the long-term impacts of aphasia: how far does the Conversation Partner Programme go? <i>Aphasiology</i> . 2015;29(8):889-913. | Ireland        | Adults with aphasia post-stroke                                                                                                                                                   | 5  | 4m, 1w | 73, range 60-85                 | 5.4, range 3-10                      | Participatory Learning and Action (PLA) data co-generation sessions | Thematic                                | To describe participants' insider (emic) experiences of (1) aphasia and (2) a Conversation Partner Programme.                                                                              |
| 24 | McLellan KM, McCann CM, Worrall LE,                                                                                                                                               | New Zealand    | Māori adults with aphasia and their                                                                                                                                               | 11 | 4m, 7w | Min age range: 50-59;           | Range <2 - 10+ years                 | Semi-structured interviews                                          | Interpretive description, Kaupapa Māori | To describe and interpret the experiences of Māori with aphasia and their whānau                                                                                                           |



## S8 Summary of included studies

|    |                                                                                                                                                                        |                |                                 |    |          |                          |                              |                                                                                            |                                                                         |                                                                                                                                                                                                                                                           |
|----|------------------------------------------------------------------------------------------------------------------------------------------------------------------------|----------------|---------------------------------|----|----------|--------------------------|------------------------------|--------------------------------------------------------------------------------------------|-------------------------------------------------------------------------|-----------------------------------------------------------------------------------------------------------------------------------------------------------------------------------------------------------------------------------------------------------|
|    | Harwood MLN. "For Māori, language is precious. And without it we are a bit lost": Māori experiences of aphasia. <i>Aphasiology</i> . 2013;28(4):453-70.                |                | whānau (extended family)        |    |          | Max age range: 70-79     |                              |                                                                                            | research (KMR) approach                                                 | (extended family), to inform service delivery for this population.                                                                                                                                                                                        |
| 25 | Morris K, Ferguson A, Worrall L. A qualitative study of legal and social justice needs for people with aphasia. <i>Int J Speech Lang Pathol</i> . 2014;16(6):541-51.   | Australia      | Adults with aphasia post-stroke | 50 | 24m, 26w | 63.9 ± 10.8, range 32-85 | 4.6 ± 3.6                    | Secondary analysis of Worrall et al (2011) data collected using semi-structured interviews | Content analysis                                                        | To provide first step toward further research into the prevalence of legal and access to justice issues for PWA and to provide preliminary information to inform the development of processes to ensure access to legal information and services for PWA. |
| 26 | Niemi T, Johansson U. The lived experience of engaging in everyday occupations in persons with mild to moderate aphasia. <i>Disabil Rehabil</i> . 2013;35(21):1828-34. | Finland        | Adults with aphasia post-stroke | 6  | 3m, 3w   | 57.7, range 46-75        | 2.5 years, range 1-4 years   | Semi-structured interviews                                                                 | Phenomenology - Empirical Phenomenological & Psychological method (EPP) | To describe and explore how PWA following stroke experience engaging in everyday occupations.                                                                                                                                                             |
| 27 | Northcott S, Hilari K. Why do people lose their friends                                                                                                                | United Kingdom | 29 adults with stroke           | 10 | 6m, 4w   | 57, range 48-74          | All 8-15 months post-stroke. | Semi-structured interviews                                                                 | Framework                                                               | To explore why people lose contact with their friends, whether there are any                                                                                                                                                                              |

## S8 Summary of included studies

|    |                                                                                                                                                                                        |                |                                 |    |                                           |                                                   |                                                           |                                                                                            |                  |                                                                                                                                                                                                                                             |
|----|----------------------------------------------------------------------------------------------------------------------------------------------------------------------------------------|----------------|---------------------------------|----|-------------------------------------------|---------------------------------------------------|-----------------------------------------------------------|--------------------------------------------------------------------------------------------|------------------|---------------------------------------------------------------------------------------------------------------------------------------------------------------------------------------------------------------------------------------------|
|    | after a stroke? Int J Lang Commun Disord. 2011;46(5):524-34.                                                                                                                           |                |                                 |    |                                           |                                                   |                                                           |                                                                                            |                  | protective factors and how friendship loss and change is perceived by the individual.                                                                                                                                                       |
| 28 | Parr S. Psychosocial aspects of aphasia: Whose perspectives? Folia Phoniatica Et Logopaedica. 2001;53(5):266-88.                                                                       | United Kingdom | Adults with aphasia post-stroke | 50 | 28m, 22w                                  | Minimum age range: <45; Maximum age range: 75+.   | 7.4, range slightly less than 5 years - 22years           | Semi-structured interviews                                                                 | Framework        | To summarise some key features / findings of an earlier qualitative study (Parr et al 1997) and to explore the 'meaning' of aphasia from the insider perspective in terms of its long-term consequences and significance in people's lives. |
| 29 | Pearl G, Sage K, Young A. Involvement in volunteering: an exploration of the personal experience of people with aphasia. Disabil Rehabil. 2011;33(19-20):1805-21.                      | United Kingdom | Adults with aphasia post-stroke | 15 | Interviews: 6m, 4w; Focus groups: 4m, 1w. | Minimum age range: 30-45; Maximum age range: 60+. | Interviews: 5.6, range 3-12 Focus groups: 4.6, range 1-10 | Semi-structured interviews and focus groups                                                | Thematic         | To identify the perceptions and experiences of PWA towards the effects of participating in volunteering activity and the barriers and facilitators to effective participation.                                                              |
| 30 | Tomkins B, Siyambalapitiya S, Worrall L. What do people with aphasia think about their health care? Factors influencing satisfaction and dissatisfaction. Aphasiology. 2013;27(8):972- | Australia      | Adults with aphasia post-stroke | 50 | 24m, 26w                                  | 63.9 ± 10.8, range 32-85                          | 4.6 ± 3.6                                                 | Secondary analysis of Worrall et al (2011) data collected using semi-structured interviews | Content analysis | To explore the factors influencing the satisfaction and dissatisfaction of PWA with regards to their healthcare                                                                                                                             |

S8 Summary of included studies

|    |                                                                                                                                                                |           |                                 |    |          |                          |           |                            |                  |                                                                          |
|----|----------------------------------------------------------------------------------------------------------------------------------------------------------------|-----------|---------------------------------|----|----------|--------------------------|-----------|----------------------------|------------------|--------------------------------------------------------------------------|
|    | 91.                                                                                                                                                            |           |                                 |    |          |                          |           |                            |                  |                                                                          |
| 31 | Worrall L, Sherratt S, Rogers P, Howe T, Hersh D, Ferguson A, et al. What people with aphasia want: Their goals according to the ICF. Aphasiology. 2011;25(3). | Australia | Adults with aphasia post-stroke | 50 | 24m, 26w | 63.9 ± 10.8, range 32-85 | 4.6 ± 3.6 | Semi-structured interviews | Content analysis | To describe the goals of PWA and to code the goals according to the ICF. |
